# Supplementary material for: Removal of NaCl from saltwater solutions using micro/mesoporous carbon sheets derived from watermelon peel via deionization capacitors
Source: Royal Society of Chemistry journal article supplement (doi:10.1039/c6ra27127h), 2017-01-01
Supplement: c6ra27127h1.pdf [file c6ra27127h1.pdf]

## *Electronic Supplementary Information(ESI)*

### **Removal of NaCl from saltwater solutions using micro/mesoporous carbon sheets derived from watermelon peels via deionization capacitors**

*Shanshan Zhao, Tingting Yan, Zhuo Wang, Jianping Zhang, Liyi Shi and Dongsong Zhang\**

*Research Center of Nano Science and Technology, Shanghai University, Shanghai 200444, China.*

*Fax: 86 21 66136079; E-mail: dszhang@shu.edu.cn*

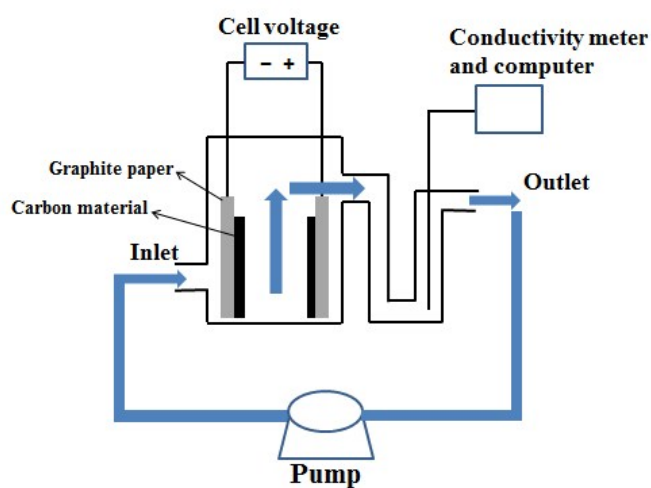

**Fig.S1** Schematic of the flow-through electrode setup.

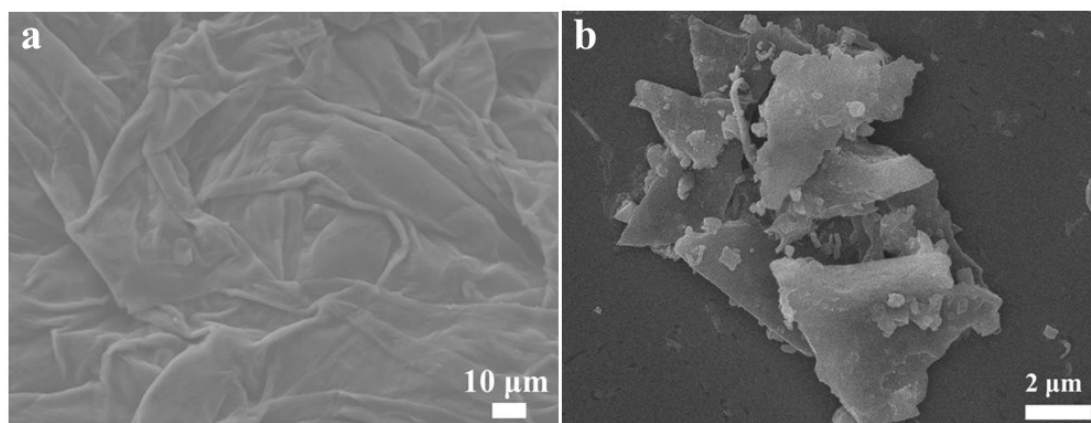

**Fig. S2** SEM images of the (a) freeze dried watermelon peel and (b) carbonized watermelon peel (before HF etching).

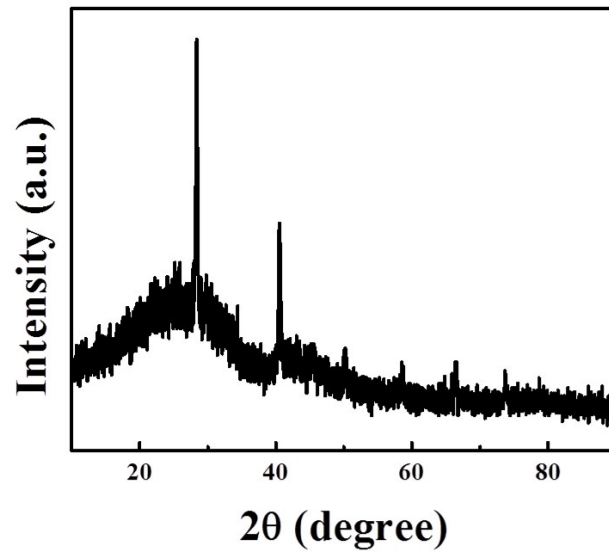

**Fig.S3** XRD patterns of the carbonized watermelon peel (before HF etching).

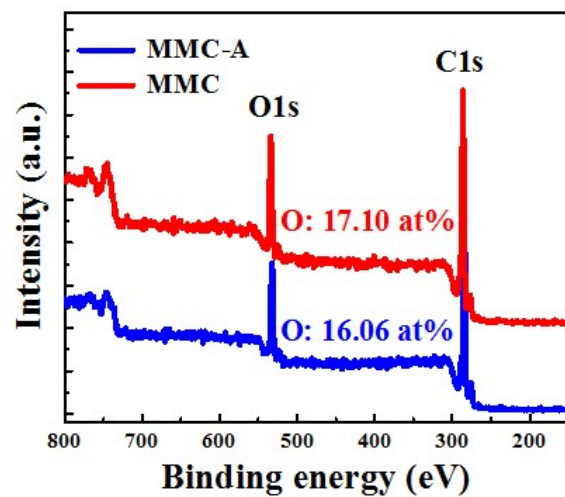

Fig.S4 XPS spectra of MMC-A and MMC.

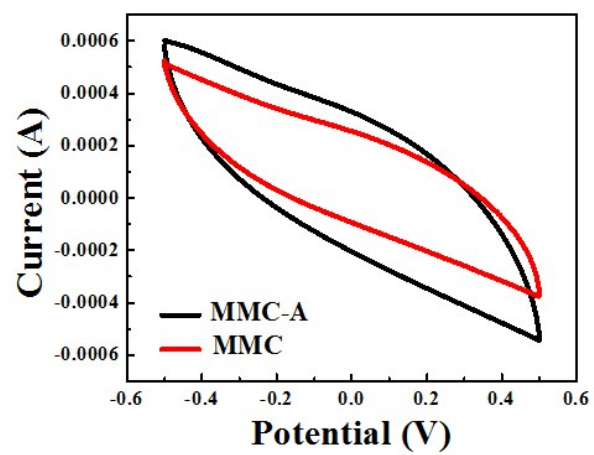

**Fig. S5** CV curves of the MMC-A and MMC electrodes at  $1\text{mV s}^{-1}$  in a  $500\text{ mg L}^{-1}$  NaCl solution.

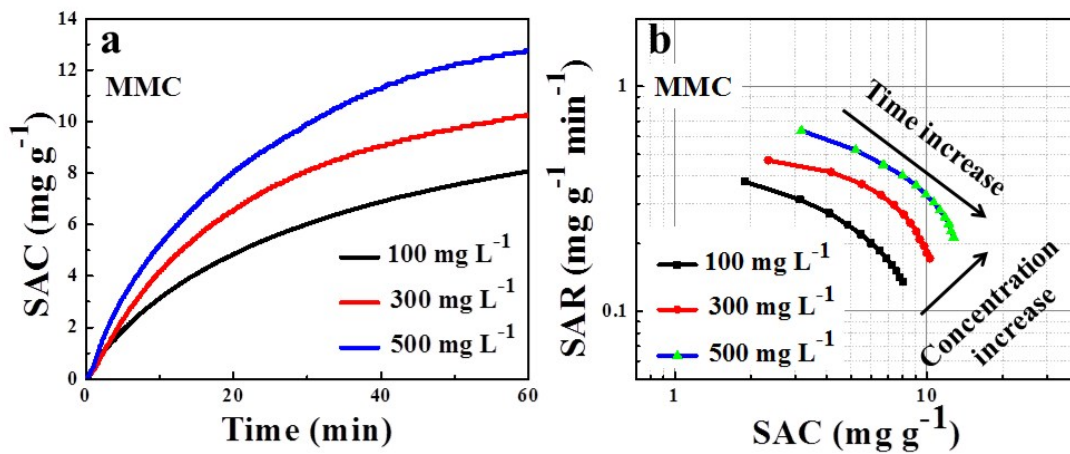

**Fig. S6** (a) Plots of SAC vs. deionization time for the MMC electrodes; (b) Ragone plots of SAR vs. SAC for the MMC electrodes at a cell voltage of 1.2 V.

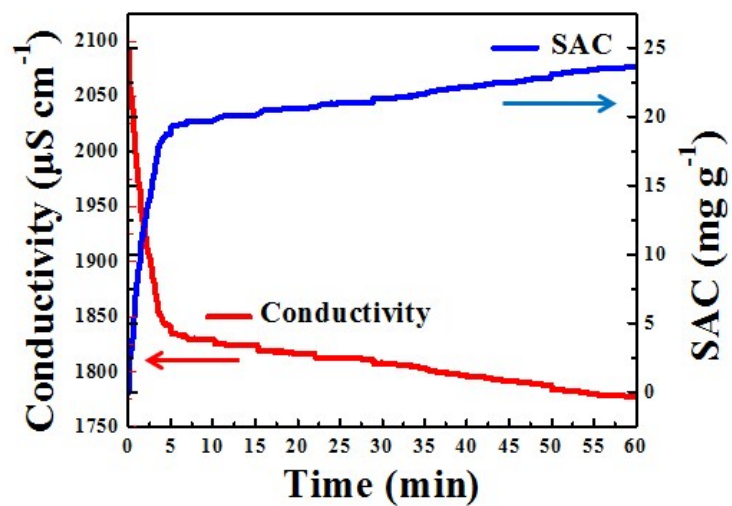

**Fig.S7** Plots of solution conductivity and SAC vs. time for the MMC-A electrodes in a 1000 mg L<sup>-1</sup> NaCl solution at 1.2 V. The SAC of electrodes is 23.65 mg g<sup>-1</sup>.

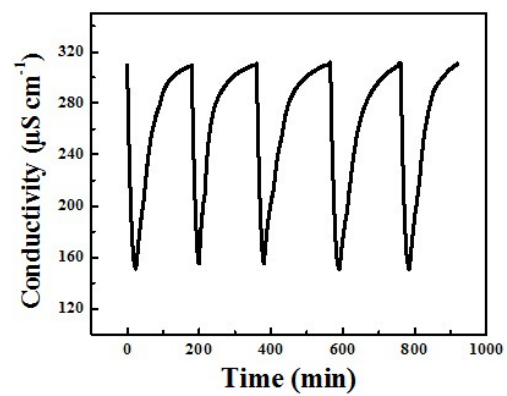

**Fig.S8** Regeneration curves of the MMC-A electrodes in a  $150 \text{ mg L}^{-1}$  NaCl solution at 1.2 V.



**Table S1.** Comparison of salt adsorption capacity of different electrode materials for flow-through deionization capacitor

| Electrode material                                        | Cell voltage<br>(V) | NaCl concentration<br>(mg L <sup>-1</sup> ) | SAC<br>(mg g <sup>-1</sup> ) | Ref.      |
|-----------------------------------------------------------|---------------------|---------------------------------------------|------------------------------|-----------|
| Purified graphene                                         | 1.5                 | ~100                                        | 1.27                         | [1]       |
| Carbon nanotubes/graphene                                 | 1.2                 | ~500                                        | 1.4                          | [2]       |
| Carbon nanotubes                                          | 1.2                 | 500                                         | 2.57                         | [3]       |
| Activated carbon treated by sulfuric acid                 | 1.2                 | 500                                         | ~2.9                         | [4]       |
| Activated carbon/polyaniline                              | 1.2                 | 200                                         | ~3.2                         | [5]       |
| Nitrogen-doped graphene                                   | 1.8                 | 100                                         | 4.81                         | [6]       |
| Porous carbon spheres                                     | 1.6                 | 500                                         | 5.81                         | [7]       |
| Activated carbon nanofibers/carbon nanotubes              | 1.2                 | 400                                         | 6.4                          | [8]       |
| Porous carbon nanofibers/dimethyl sulfone                 | 1.2                 | 500                                         | 8.1                          | [9]       |
| Porous carbon                                             | 1.2                 | 500                                         | 9.39                         | [10]      |
| Activated carbon                                          | 1.2                 | 500                                         | 9.72                         | [11]      |
| Graphene aerogels                                         | 1.2                 | 500                                         | 9.9                          | [12]      |
| Graphenic fibers                                          | 1.2                 | 500                                         | 13.1                         | [13]      |
| Graphene oxide/porous carbon nanofibers                   | 1.2                 | 450                                         | 13.2                         | [14]      |
| Nitrogen-doped porous carbon spheres                      | 1.2                 | 500                                         | 13.71                        | [15]      |
| Porous carbon polyhedra                                   | 1.2                 | 500                                         | 13.86                        | [16]      |
| Three-Dimensional Graphene Architecture<br>with Nanopores | 1.6                 | 500                                         | 15                           | [17]      |
| Carbon nanorods                                           | 1.2                 | 500                                         | 15.12                        | [18]      |
| Mesoporous graphene                                       | 1.6                 | ~500                                        | 15.21                        | [19]      |
| Nitrogen-doped carbon nanorods                            | 1.2                 | 500                                         | 17.62                        | [20]      |
| Mesoporous carbon                                         | 1.2                 | 4000                                        | 15.2                         | [21]      |
| resorcinol-formaldehyde mesoporous<br>carbon              | 1.2                 | 3000                                        | 14.68                        | [22]      |
| Micro/mesoporous carbon                                   | 1.2                 | 100                                         | 12.43                        | This work |
| Micro/mesoporous carbon                                   | 1.2                 | 300                                         | 15.34                        | This work |
| Micro/mesoporous carbon                                   | 1.2                 | 500                                         | 17.38                        | This work |

## References

- 1 T. N. Tuan, S. Chung, J. K. Lee and J. Lee, *Current Applied Physics*, 2015, **15**, 1397-1401.
- 2 H. Li, S. Liang, J. Li and L. He, *J. Mater. Chem. A*, 2013, **1**, 6335-6341.
- 3 S. Wang, D. Wang, L. Ji, Q. Gong, Y. Zhu and J. Liang, *Sep. Purif. Technol.*, 2007, **58**, 12-16.
- 4 R. Niu, H. Li, Y. Ma, L. He and J. Li, *Electrochim. Acta*, 2015, **176**, 755-762.
- 5 C. Yan, L. Zou and R. Short, *Desalination*, 2014, **333**, 101-106.
- 6 X. Xu, L. Pan, Y. Liu, T. Lu and Z. Sun, *J. Colloid Interface Sci.*, 2015, **445**, 143-150.
- 7 Y. Liu, L. Pan, T. Chen, X. Xu, T. Lu, Z. Sun and D. H. C. Chua, *Electrochim. Acta*, 2015, **151**, 489-496.
- 8 Q. Dong, G. Wang, T. Wu, S. Peng and J. Qiu, *J. Colloid Interface Sci.*, 2015, **446**, 373-378.

- 9 H. Pan, J. Yang, S. Wang, Z. Xiong, W. Cai and J. Liu, *J. Mater. Chem. A*, 2015, **3**, 13827-13834.
- 10 L. Chang, J. Li, X. Duan and W. Liu, *Electrochim. Acta*, 2015, **176**, 956-964.
- 11 Z. Chen, C. Song, X. Sun, H. Guo and G. Zhu, *Desalination*, 2011, **267**, 239-243.
- 12 H. Yin, S. Zhao, J. Wan, H. Tang, L. Chang, L. He, H. Zhao, Y. Gao and Z. Tang, *Adv. Mater.*, 2013, **25**, 6270-6276.
- 13 N. Pugazhenthiran, S. Sen Gupta, A. Prabhath, M. Manikandan, J. R. Swathy, V. K. Raman and T. Pradeep, *ACS Appl. Mater. Interfaces*, 2015, **7**, 20156-20163.
- 14 Y. Bai, Z.-H. Huang, X.-L. Yu and F. Kang, *Colloid. Surface. A: Physicochemical and Engineering Aspects*, 2014, **444**, 153-158.
- 15 Y. Liu, T. Chen, T. Lu, Z. Sun, D. H. C. Chua and L. Pan, *Electrochim. Acta*, 2015, **158**, 403-409.
- 16 Y. Liu, X. Xu, M. Wang, T. Lu, Z. Sun and L. Pan, *Chem. Commun.*, 2015, **51**, 12020-12023.
- 17 W. Shi, H. Li, X. Cao, Z. Y. Leong, J. Zhang, T. Chen, H. Zhang and H. Y. Yang, *Sci. Rep.*, 2016, **6**, 18966.
- 18 Y. Liu, L. Pan, X. Xu, T. Lu, Z. Sun and D. H. C. Chua, *J. Mater. Chem. A*, 2014, **2**, 20966-20972.
- 19 X. Gu, M. Hu, Z. Du, J. Huang and C. Wang, *Electrochim. Acta*, 2015, **182**, 183-191.
- 20 Y. Liu, X. Xu, M. Wang, T. Lu, Z. Sun and L. Pan, *J. Mater. Chem. A*, 2015, **3**, 17304-17311.
- 21 C. Tsouris, R. Mayes, J. Kiggans, K. Sharma, S. Yiacoumi, D. DePaoli and S. Dai, *Environ. Sci. Technol.*, 2011, **45**, 10243-10249.
- 22 R. T. Mayes, C. Tsouris, J. O. Kiggans Jr, S. M. Mahurin, D. W. DePaoli and S. Dai, *J. Mater. Chem.*, 2010, **20**, 8674-8678.
